# Supplementary material for: Strain diversity of Treponema pallidum subsp. pertenue suggests rare interspecies transmission in African nonhuman primates
Source: PubMed Central journal article supplement (PMC6775232; doi:10.1038/s41598-019-50779-9), 2019-10-02
Supplement: 41598_2019_50779_MOESM1_ESM.pdf [file 41598_2019_50779_MOESM1_ESM.pdf]

## 1 **Technical appendix**

2

### 3 **Strain diversity of *Treponema pallidum* subsp. *pertenue* suggests rare interspecies**

#### 4 **transmission in African nonhuman primates**

5

6 **Authors:** Idrissa S. Chuma<sup>1,2,3\*</sup>, Christian Roos<sup>2,4\*</sup>, Anagaw Atickem<sup>5</sup>, Torsten Boehm<sup>6</sup>, D.

7 Anthony Collins<sup>7</sup>, Linda Grillová<sup>8,9</sup>, Luisa K. Hallmaier-Wacker<sup>1,2</sup>, Rudovick R. Kazwala<sup>3</sup>,

8 Julius D. Keyyu<sup>9</sup>, Simone Lüert<sup>1,2</sup>, Ulrich Maloueki<sup>6,11</sup>, Jan Oppelt<sup>9,12</sup>, Klára J.

9 Petrželková<sup>13,14,15</sup>, Alexander Piel<sup>16,17</sup>, Fiona A. Stewart<sup>16,17</sup>, David Šmajš<sup>9</sup>, Sascha Knaufl<sup>1,18§</sup>

10

## 11 **Design of the Multi-Locus Sequence Typing system**

### 12 *Identification of most variable genes in TPE*

13 We identified six candidate genes with the SNVs frequency per kbp ranging from 8-29, which

14 code outer membrane proteins or hypothetical proteins (*TP0136*, *TP0326*, *TP0488*, *TP0548*,

15 *TP0858*, *TP0865*; Table 1). Most of the loci were identified as putative intra- or inter-strain

16 recombination genes (*TP0136*, *TP0326*, *TP0488*, *TP548* and *TP0865*)<sup>30,32,37-38</sup>.

17

### 18 *Resolution power of genome-wide data and individual loci*

19 Genome-wide maximum-likelihood (ML) trees of 23 available complete and draft genome

20 sequences were based on 1,207 variable sites and allowed to distinguish 22 haplotypes (data

21 not showed). Given the fact that strains CDC 2575 and Ghana-051 are completely identical<sup>20</sup>,

22 the genome-wide tree had 100% resolution of whole genome sequences. Among six candidate

23 loci, the highest resolution power was observed in *TP0488* (70%) followed by *TP0326*,

24 *TP0548*, *TP0858* (all 57%), *TP0136* (44%) and *TP0865* (31.8%). Interestingly, the  
25 concatenated sequences of all candidate loci did not reveal higher resolution than the  
26 resolution observed in the *TP0488* gene (70%).

27

28 *Identification of the most suitable typing loci for TPE MLST among and within the candidate*  
29 *genes*

30 Since the amplification efficiency of *Treponema* DNA from clinical samples has been  
31 shown to be dependent on the length of the PCR products<sup>10,39</sup>, we selected loci with the  
32 highest occurrence of variable sites accumulated in as short DNA regions as possible (Table  
33 S2). Furthermore, we preferred loci with the highest percentage of genome-wide resolution  
34 and last, we selected loci that were able to clearly distinguish treponematoses caused by *TPE*  
35 from the *TPA/TEN* infections (Table S2).

36

### 37 **DNA extraction**

38 DNA extraction for tissue samples was performed as described elsewhere<sup>2</sup>. Swab materials  
39 followed the same protocol as described for the skin tissues using the QIAamp DNA Mini Kit  
40 (Qiagen, Hilden, Germany) with some modifications. Briefly, each swab was digested in 450  
41  $\mu$ l custom-made lysis buffer (10 mM Tris [pH 8.0], 0.1 M EDTA [pH 8.0], and 0.5% sodium  
42 dodecyl sulfate), the same buffer in which the swab was collected. In addition, the remaining  
43 lysis buffer was also digested. In both reactions, care was taken to keep the ratio of buffer and  
44 proteinase K as recommended by the manufacturer. The samples were digested overnight at  
45 56°C and 900 rpm (Thermomixer Comfort, Eppendorf, Hamburg, Germany). On the next day,  
46 reaction tubes that contained swabs were placed on top of a new PCR clean reaction tube of  
47 2.0 ml volume. A sterile 20G needle was used to penetrate the bottom of the reaction tube to  
48 allow for subsequent separation of DNA containing fluid from the swab through vigorous  
49 centrifugation at 6,000 xg for 5 min at room temperature. All subsequent steps followed the

50 manufactures protocol. The DNA was eluted twice with 100  $\mu$ L AE buffer and was further  
51 purified using glycogen precipitation according to the protocol published in Knauf et al.<sup>24</sup>.

52 Ethanol (98%)-preserved fecal samples from western lowland gorillas (*Gorilla gorilla*  
53 *gorilla*) were extracted using the First DNA All-tissue extraction kit (Gen-ial, Troisdorf,  
54 Germany). Briefly, the procedure followed the manufacturer's guidance with some minor  
55 modifications. Feces were dried from ethanol overnight and subsequently resolved in 1 ml of  
56 the kit's containing lysis buffers #1 and 100  $\mu$ l of lysis buffer #2. Samples were then  
57 incubated with 20  $\mu$ l proteinase K at 65°C and 1000 rpm (Thermomixer Comfort, Eppendorf,  
58 Hamburg, Germany) for 50 min. All subsequent steps followed those of the manufacturer's  
59 protocol.

60

61 **Table S1. *TPE* genomes used to identify most suitable gene candidates for the MLST**  
 62 **design.** § In order to determine the whole genome sequence, the *TPE* strain was multiplied in  
 63 experimental animals prior to the NGS. § Culture-independent enrichments (hybridization  
 64 captures) were used prior to the NGS in order to separate the *TP* genetic material from the  
 65 host DNA. Compl.=complete

| Strains ID            | Genome | Source                          | Host  | Year of isolation | Geographic area | References  |
|-----------------------|--------|---------------------------------|-------|-------------------|-----------------|-------------|
| CDC-1                 | Compl. | Rabbit inoculation <sup>§</sup> | Human | 1980              | Ghana           | unpublished |
| CDC-2                 | Compl. | Rabbit inoculation <sup>§</sup> | Human | 1980              | Ghana           | 40          |
| Samoa D               | Compl. | Rabbit inoculation <sup>§</sup> | Human | 1953              | Western Samoa   | 40          |
| Gauthier              | Compl. | Rabbit inoculation <sup>§</sup> | Human | 1960              | Congo           | 40          |
| Fribourg-Blanc        | Compl. | Rabbit inoculation <sup>§</sup> | NHPs  | 1966              | Ghana           | 41          |
| CDC 2575              | Compl. | Rabbit inoculation <sup>§</sup> | Human | 1980              | Ghana           | 21          |
| Ghana-051             | Compl. | Rabbit inoculation <sup>§</sup> | Human | 1988              | Ghana           | 21          |
| Sei Geringging K403   | Compl. | Rabbit inoculation <sup>§</sup> | Human | 1990              | Indonesia       | 42          |
| Kampung Dalan K363    | Compl. | Rabbit inoculation <sup>§</sup> | Human | 1990              | Indonesia       | 42          |
| LMNP-1                | Compl. | Clinical <sup>§</sup>           | NHPs  | 2007              | Tanzania        | 1           |
| LMNP-2                | Draft  | Clinical <sup>§</sup>           | NHPs  | 2007              | Tanzania        | 1           |
| Gambia-1              | Draft  | Clinical <sup>§</sup>           | NHPs  | unknown           | Gambia          | 1           |
| Gambia-2              | Draft  | Clinical <sup>§</sup>           | NHPs  | unknown           | Gambia          | 1           |
| Senegal NKNP-1        | Draft  | Clinical <sup>§</sup>           | NHPs  | unknown           | Senegal         | 1           |
| Senegal NKNP-2        | Draft  | Clinical <sup>§</sup>           | NHPs  | unknown           | Senegal         | 1           |
| Cote d'Ivoire TaiNP-1 | Draft  | Clinical <sup>§</sup>           | NHP   | unknown           | Ivory Coast     | 1           |
| Cote d'Ivoire TaiNP-2 | Draft  | Clinical <sup>§</sup>           | NHP   | unknown           | Ivory Coast     | 1           |

|            |       |                       |       |      |                 |    |
|------------|-------|-----------------------|-------|------|-----------------|----|
| ERR1470330 | Draft | Clinical <sup>§</sup> | Human | 2013 | Solomon Islands | 43 |
| ERR1470331 | Draft | Clinical <sup>§</sup> | Human | 2013 | Solomon Islands | 43 |
| ERR1470334 | Draft | Clinical <sup>§</sup> | Human | 2013 | Solomon Islands | 43 |
| ERR1470338 | Draft | Clinical <sup>§</sup> | Human | 2013 | Solomon Islands | 43 |
| ERR1470343 | Draft | Clinical <sup>§</sup> | Human | 2013 | Solomon Islands | 43 |
| ERR1470344 | Draft | Clinical <sup>§</sup> | Human | 2013 | Solomon Islands | 43 |

---

66

67

68 **Table S2: Characteristics of candidate genes for *TPE* typing.** § According to the yaws  
 69 reference genome Samoa D (GenBank accession number CP002374.1). § The genomes listed  
 70 in Table 1 including representatives of *TPE* strains, representative of TEN (Bosnia A,  
 71 GenBank accession number CP007548.1) and representatives of *TPA* (Nichols, GenBank  
 72 accession number CP004010.2; SS14, GenBank accession number CP004011.1; Mexico,  
 73 GenBank accession number CP003064.1) were used to test whether the corresponding  
 74 sequences can be used for subspecies classification (*TPA/TPE/TEN*).

| Gene <sup>§</sup> | Variable region length (bp) | Variable region coordinates <sup>§</sup> | % of genome-wide data resolution | Differen-<br>tiating TPE from TPA/TEN <sup>§</sup> | Differen-<br>tiating TPA/TPE/TE N <sup>§</sup> |
|-------------------|-----------------------------|------------------------------------------|----------------------------------|----------------------------------------------------|------------------------------------------------|
| <i>TP0488</i>     | 782                         | 522,942 – 523,723                        | 70.0                             | Yes                                                | No                                             |
| <i>TP0548</i>     | 755                         | 593,318 – 594,072                        | 57.0                             | No                                                 | No                                             |
| <i>TP0858</i>     | 824                         | 936,118 – 936,941                        | 57.0                             | Yes                                                | Yes                                            |
| <i>TP0326</i>     | 2,086                       | 346,066 – 348,151                        | 57.0                             | Yes                                                | No                                             |
| <i>TP0136</i>     | 910                         | 157,823 – 158,733                        | 44.0                             | Yes                                                | Yes                                            |
| <i>TP0865</i>     | 897                         | 945,224 – 946,121                        | 31.8                             | Yes                                                | Yes                                            |

75

76

77

78 **Table S3. Summary of TP sequence data of NHP origin included into this study.** \*multi-  
 79 strain infection present, NP=National Park, CA=Conservation Area, TZ=Tanzania,  
 80 ET=Ethiopia, RC=Republic of the Congo. Details on NHP species composition can be found  
 81 in Table S5.

| Country | Sample location     | n<br>NHPs | n<br>TP0619<br>sequences | n<br>TP0548<br>sequences | n<br>TP0488<br>sequences | n<br>concatenated<br>sequences |
|---------|---------------------|-----------|--------------------------|--------------------------|--------------------------|--------------------------------|
| TZ      | Gombe NP            | 3         | 1                        | 3                        | 3                        | 3                              |
| TZ      | Lake Manyara<br>NP  | 46        | 41                       | 44*                      | 37                       | 33                             |
| TZ      | Katavi NP           | 1         | 1                        | 0                        | 1                        | 0                              |
| TZ      | Mahale NP           | 1         | 1                        | 1                        | 0                        | 0                              |
| TZ      | Mikumi NP           | 1         | 0                        | 1                        | 0                        | 0                              |
| TZ      | Ngorongoro CA       | 9         | 9                        | 9                        | 5                        | 5                              |
| TZ      | Ruaha NP            | 6         | 4                        | 5                        | 5                        | 4                              |
| TZ      | Serengeti NP        | 7         | 5                        | 7                        | 8*                       | 8                              |
| TZ      | Tarangire NP        | 2         | 1                        | 2                        | 1                        | 1                              |
| TZ      | Issa Valley         | 2         | 2                        | 2                        | 3*                       | 3                              |
| TZ      | Udzungwa NP         | 1         | 1                        | 1                        | 0                        | 0                              |
| ET      | Awash NP            | 2         | 1                        | 2                        | 1                        | 1                              |
| RC      | Odzala-Kokoua<br>NP | 4         | 4                        | 1                        | 4                        | 1                              |
|         | Total               | 85        | 71                       | 78                       | 67                       | 59                             |

82

83

84 **Table S4. Strains diversity and year of sampling based on the concatenated sequences**  
 85 **used for MLST (*TP0548* and *TP0488*) in NHP infecting *TP*.** Strain classification letters  
 86 (uppercase) shall not be confused with lower case letters that are used in the enhanced typing  
 87 system in human syphilis and yaws-causing strains. The letters used here are only used to  
 88 visualize and discuss the differences in *TP* strains of NHP origin.

| Strain Typ | NHP sample ID | Sampling Area | Sampling Year | Species             |
|------------|---------------|---------------|---------------|---------------------|
| A          | 21LMF2290815  | LMNP          | 2015          | <i>Papio anubis</i> |
| B          | 26F8060407    | LMNP          | 2007          | <i>Papio anubis</i> |
| C          | 47M2180407    | LMNP          | 2007          | <i>Papio anubis</i> |
| D          | 11LMF5200815  | LMNP          | 2015          | <i>Papio anubis</i> |
| D          | 13LMM8210815  | LMNP          | 2015          | <i>Papio anubis</i> |
| E          | 4LMF8160815   | LMNP          | 2015          | <i>Papio anubis</i> |
| E          | 6LMF5170815   | LMNP          | 2015          | <i>Papio anubis</i> |
| E          | 7F5250307     | LMNP          | 2007          | <i>Papio anubis</i> |
| E          | 15F8270307    | LMNP          | 2007          | <i>Papio anubis</i> |
| E          | 16M8280307    | LMNP          | 2007          | <i>Papio anubis</i> |
| E          | 21F8040407    | LMNP          | 2007          | <i>Papio anubis</i> |
| E          | 22LMF5290815  | LMNP          | 2015          | <i>Papio anubis</i> |
| E          | 32F2110407    | LMNP          | 2007          | <i>Papio anubis</i> |
| E          | 33M8120407    | LMNP          | 2007          | <i>Papio anubis</i> |
| E          | 49F8190407    | LMNP          | 2007          | <i>Papio anubis</i> |
| E          | 52F8210407    | LMNP          | 2007          | <i>Papio anubis</i> |
| E          | 54M8210407    | LMNP          | 2007          | <i>Papio anubis</i> |
| E          | 55M2230407    | LMNP          | 2007          | <i>Papio anubis</i> |
| E          | 60M5250407    | LMNP          | 2007          | <i>Papio anubis</i> |
| E          | 63M8270407    | LMNP          | 2007          | <i>Papio anubis</i> |
| E          | 67M8000507    | LMNP          | 2007          | <i>Papio anubis</i> |
| E          | 69F5090507    | LMNP          | 2007          | <i>Papio anubis</i> |
| E          | 74M8160507    | LMNP          | 2007          | <i>Papio anubis</i> |
| F          | 34F2130407    | LMNP          | 2007          | <i>Papio anubis</i> |
| G          | 70M5100507    | LMNP          | 2007          | <i>Papio anubis</i> |
| H          | 12LMF2210815  | LMNP          | 2015          | <i>Papio anubis</i> |
| H          | 19LMF8280815  | LMNP          | 2015          | <i>Papio anubis</i> |
| H          | 30LMF5190416  | LMNP          | 2015          | <i>Papio anubis</i> |
| H          | 50F2190407    | LMNP          | 2015          | <i>Papio anubis</i> |
| I          | 5TNF11241215  | TNP           | 2015          | <i>Papio anubis</i> |
| J          | 24SNM5151115  | SNP           | 2015          | <i>Papio anubis</i> |
| K          | 29SNF2191115  | SNP           | 2015          | <i>Papio anubis</i> |
| L          | 7SNM5081115   | SNP           | 2015          | <i>Papio anubis</i> |



|    |              |             |      |                                |
|----|--------------|-------------|------|--------------------------------|
| M  | 24SNM5151115 | SNP         | 2015 | <i>Papio anubis</i>            |
| N  | 20GNF5220916 | GNP         | 2016 | <i>Papio anubis</i>            |
| O  | 19GNM2220916 | GNP         | 2016 | <i>Papio anubis</i>            |
| O  | 3GNF8200916  | GNP         | 2016 | <i>Papio anubis</i>            |
| P  | 10NCM8170516 | NCA         | 2016 | <i>Papio anubis</i>            |
| P  | 12NCF5210317 | NCA         | 2017 | <i>Papio anubis</i>            |
| P  | 14NCM5210317 | NCA         | 2017 | <i>Papio anubis</i>            |
| Q  | 17NCF2220317 | NCA         | 2017 | <i>Papio anubis</i>            |
| R  | 18NCF8220317 | NCA         | 2017 | <i>Papio anubis</i>            |
| S  | 2SNF2130815  | SNP         | 2015 | <i>Papio anubis</i>            |
| S  | 6SNF2081115  | SNP         | 2015 | <i>Papio anubis</i>            |
| T  | LMNP-1       | LMNP        | 2007 | <i>Papio anubis</i>            |
| U  | 24LMM2081215 | LMNP        | 2015 | <i>Papio anubis</i>            |
| V  | 34LMM2190317 | LMNP        | 2017 | <i>Chlorocebus pygerythrus</i> |
| W  | 41SNM1231115 | SNP         | 2015 | <i>Chlorocebus pygerythrus</i> |
| X  | 9LMM2180815  | LMNP        | 2015 | <i>Cercopithecus mitis</i>     |
| Y  | 5RUM2080716  | RNP         | 2016 | <i>Chlorocebus pygerythrus</i> |
| Z  | 14RUF5130716 | RNP         | 2016 | <i>Papio cynocephalus</i>      |
| Z  | 16RUF8140716 | RNP         | 2016 | <i>Papio cynocephalus</i>      |
| AA | 6RUM2090716  | RNP         | 2016 | <i>Chlorocebus pygerythrus</i> |
| AB | 32LMM2190317 | LMNP        | 2017 | <i>Chlorocebus pygerythrus</i> |
| AC | 1UGF5101016  | Issa Valley | 2016 | <i>Papio cynocephalus</i>      |
| AC | 2UGF8101016  | Issa Valley | 2016 | <i>Papio cynocephalus</i>      |
| AD | 2UGF8101016  | Issa Valley | 2016 | <i>Papio cynocephalus</i>      |

89

90 **Table S5. GenBank accession numbers for the sequences included into this study.** (Excel  
91 Sheet)

92

93

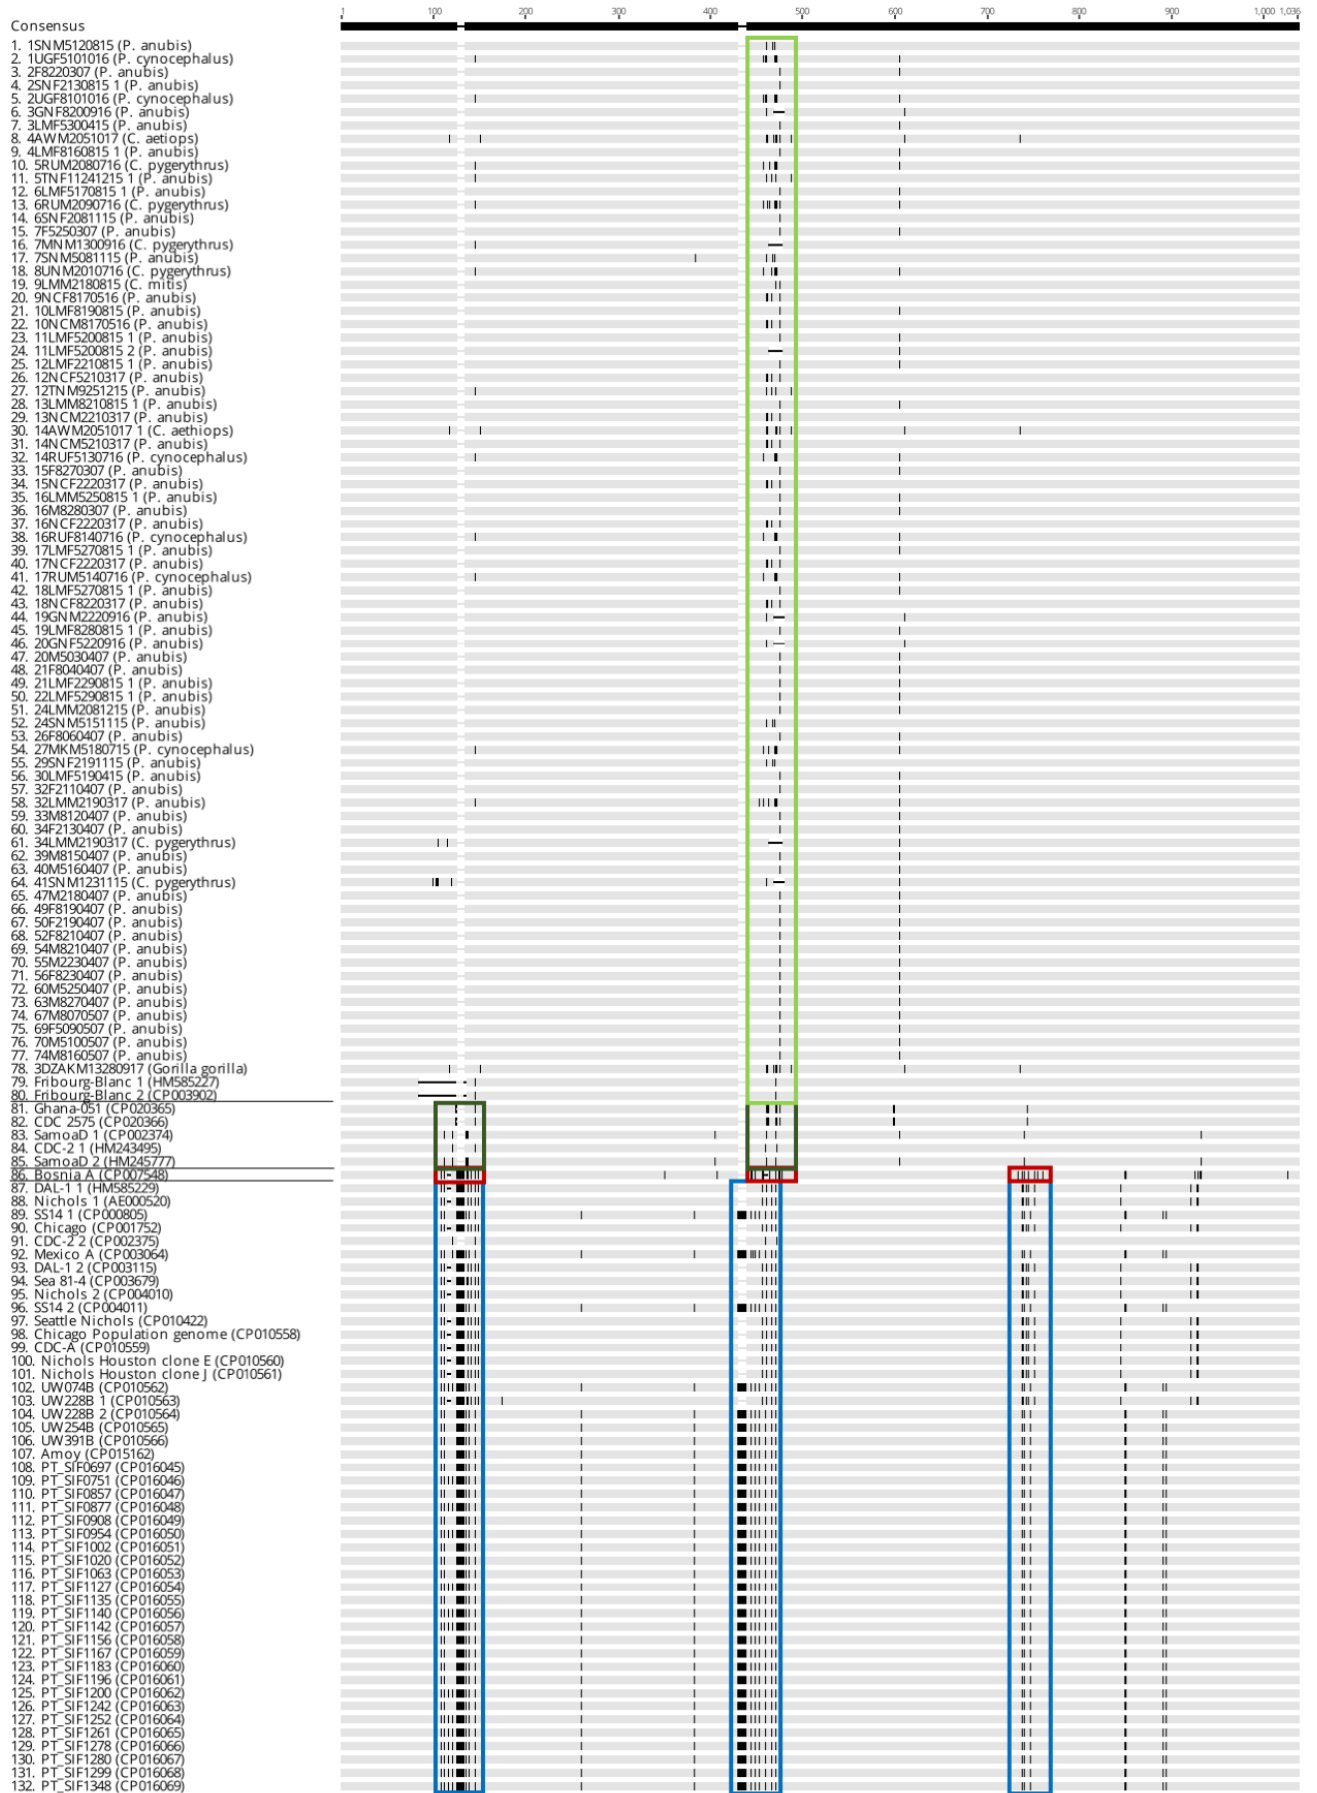

95 **Figure S1. Alignment of NHP and human *TPA*, *TEN*, and *TPE* sequence data of *TP0548***  
96 **locus.** Sequences of *TP* of NHP origin show only one part of the sequence where most of the  
97 nucleotide variation is found (light green box). This distinguishes them from human *TPA*  
98 (blue box) and *TEN* (red box) as well as human yaws-causing strains (*TPE*; dark green box),  
99 where we have three and two variable regions, respectively. GenBank accession numbers for  
100 all NHP samples are listed in Table S5.

101

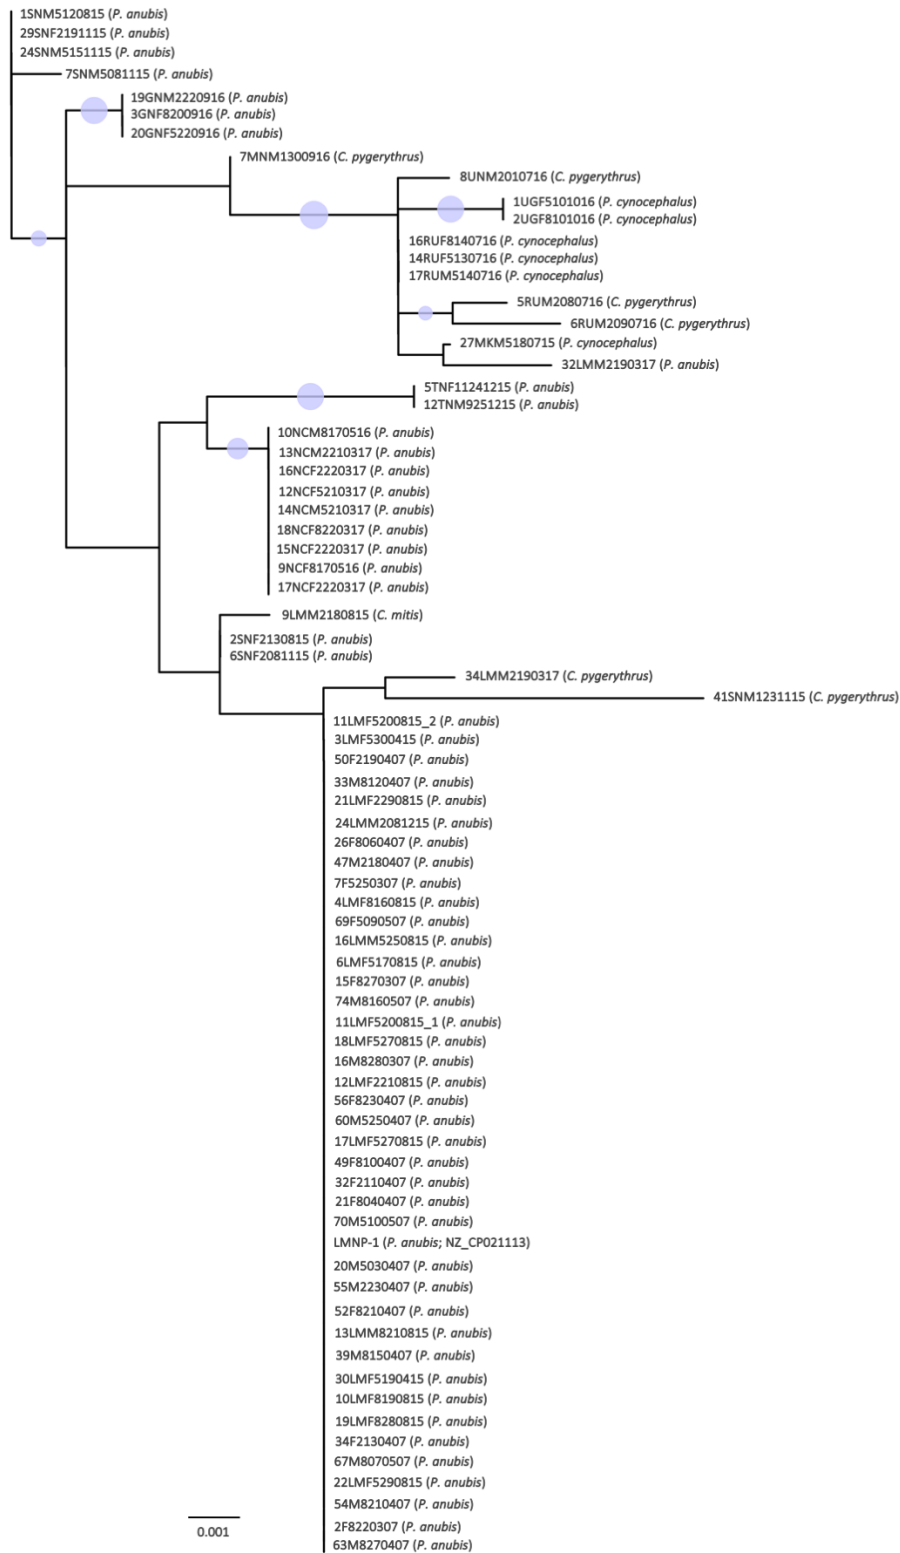

102

103 **Figure S2. ML tree for the *TP0548* locus of the Tanzanian strains of NHP origin. 1,000**  
 104 **bootstrap replicates were performed and bootstrap values from 80-100% are highlighted as**  
 105 **light blue circles of respective size. The bar indicates substitutions per site.**

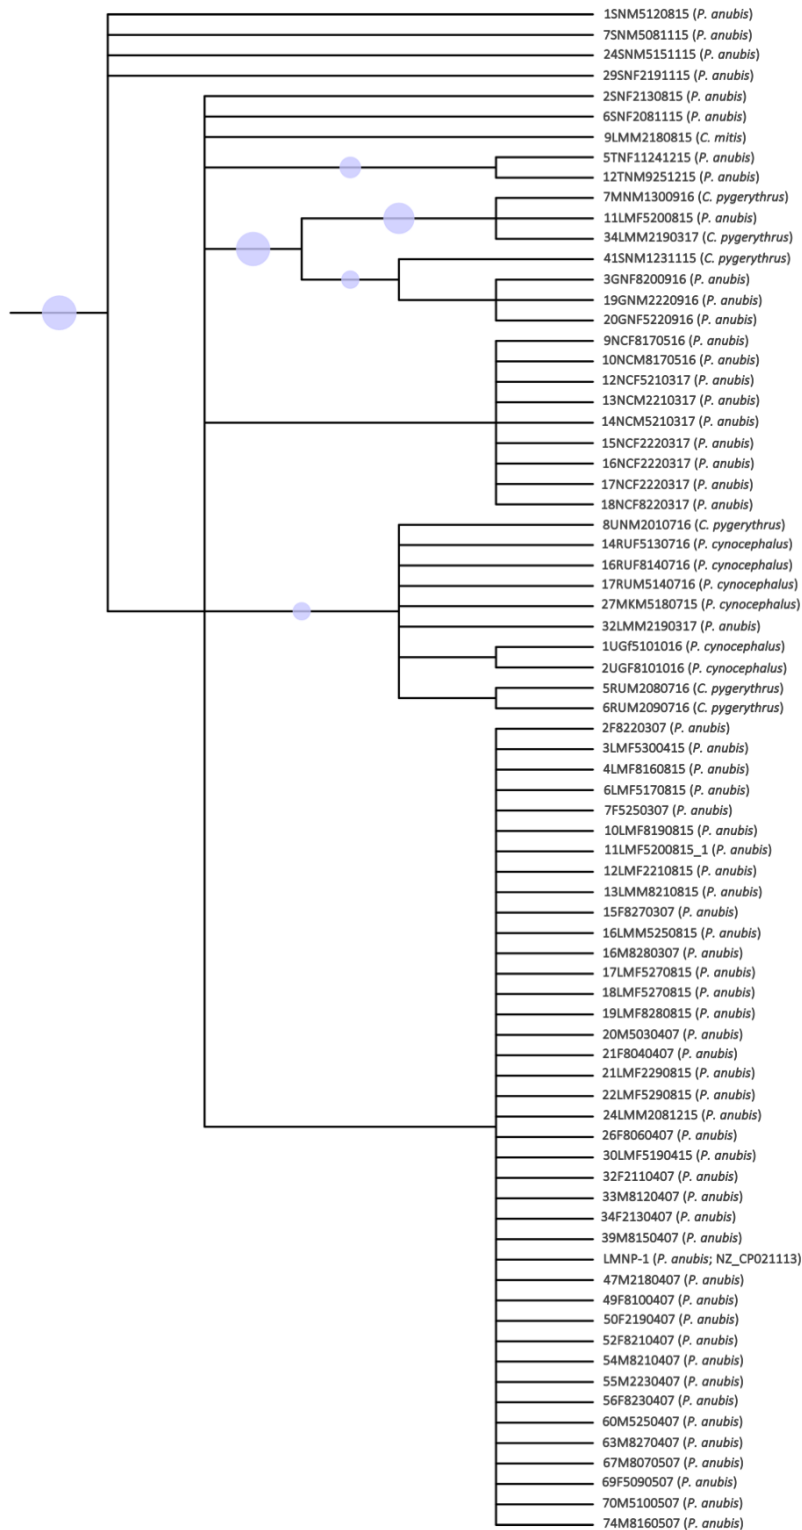

106

107 **Figure S3. MP tree for the *TP0548* locus of the Tanzanian strains of NHP origin. 1,000**  
 108 bootstrap replicates were performed and bootstrap values from 80-100% are highlighted as  
 109 light blue circles of respective size. Gaps were coded as fifth character.

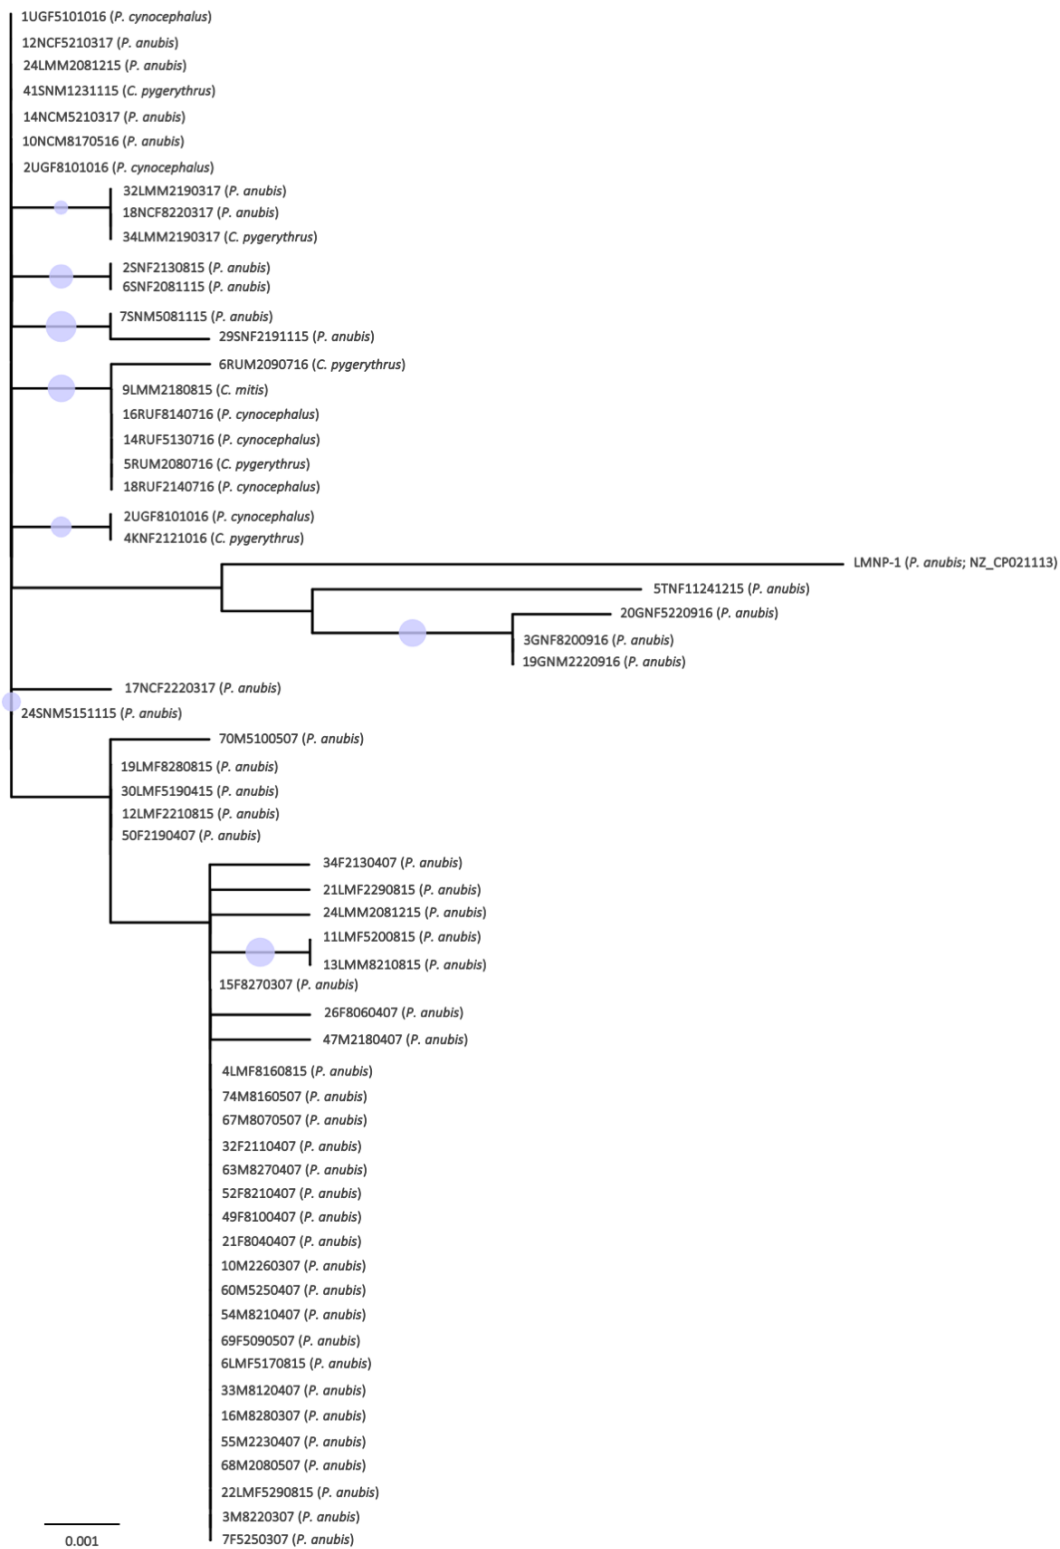

110

111 **Figure S4. ML tree for the *TP0488* locus of the Tanzanian strains of NHP origin. 1,000**  
 112 **bootstrap replicates were performed and bootstrap values from 80-100% are highlighted as**  
 113 **light blue circles of respective size. The bar indicates substitutions per site.**

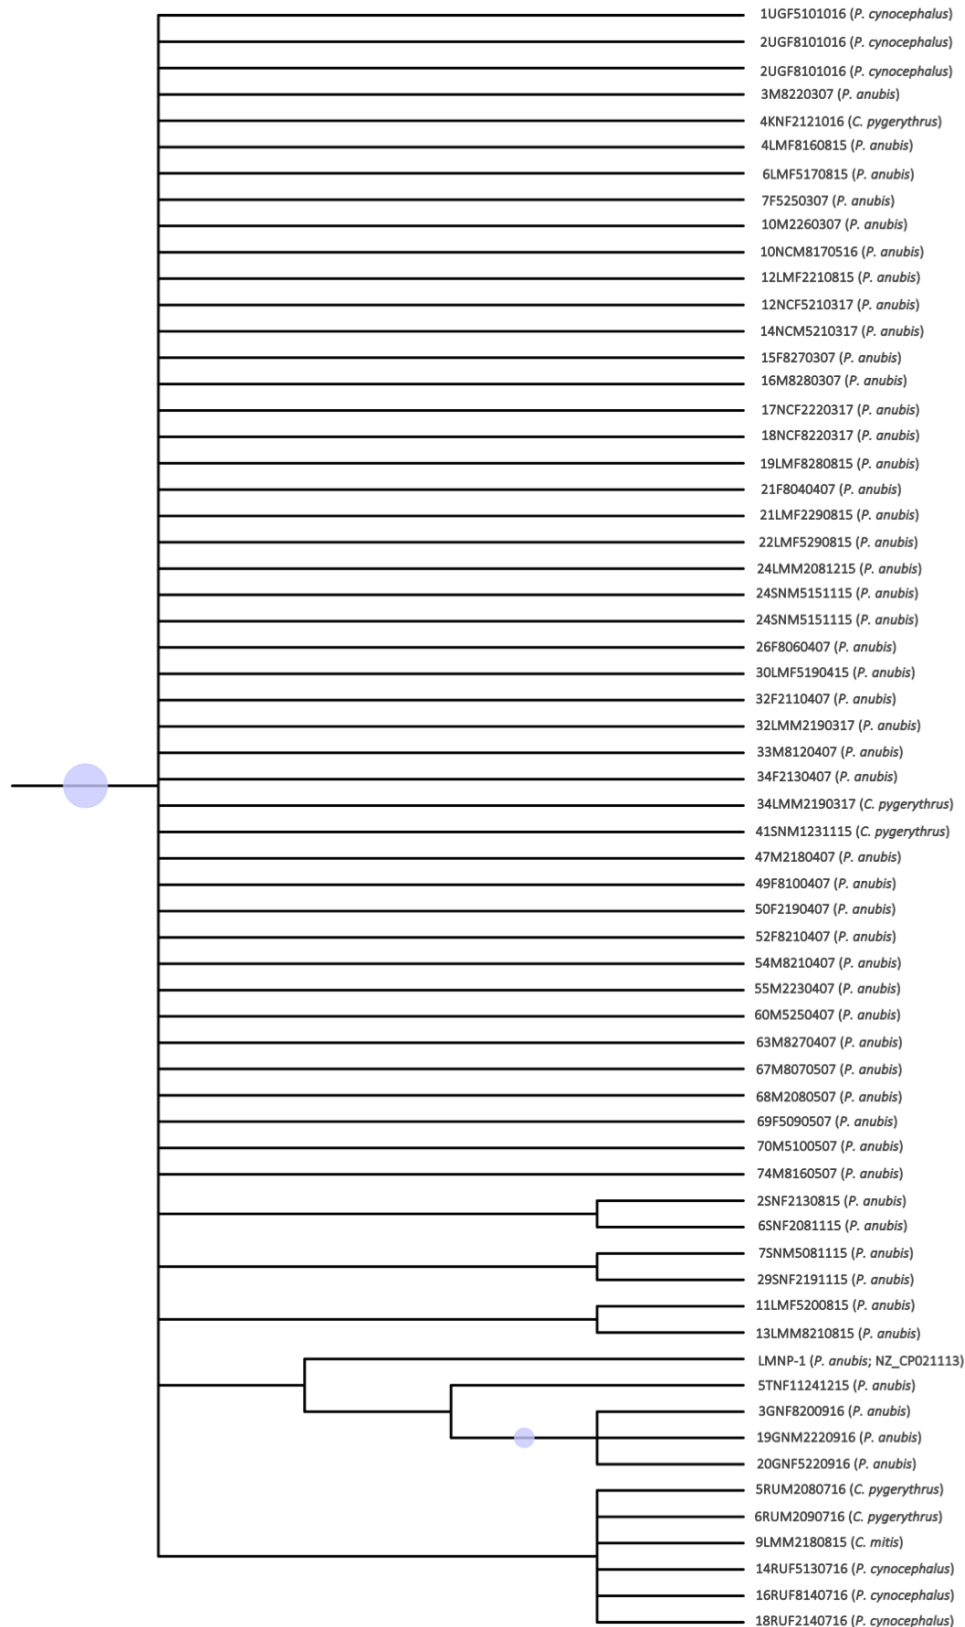

114 **Figure S5. MP tree for the *TP0488* locus of the Tanzanian strains of NHP origin. 1,000**  
 115 **bootstrap replicates were performed and bootstrap values from 80-100% are highlighted as**  
 116 **light blue circles of respective size. Gaps were coded as fifth character.**

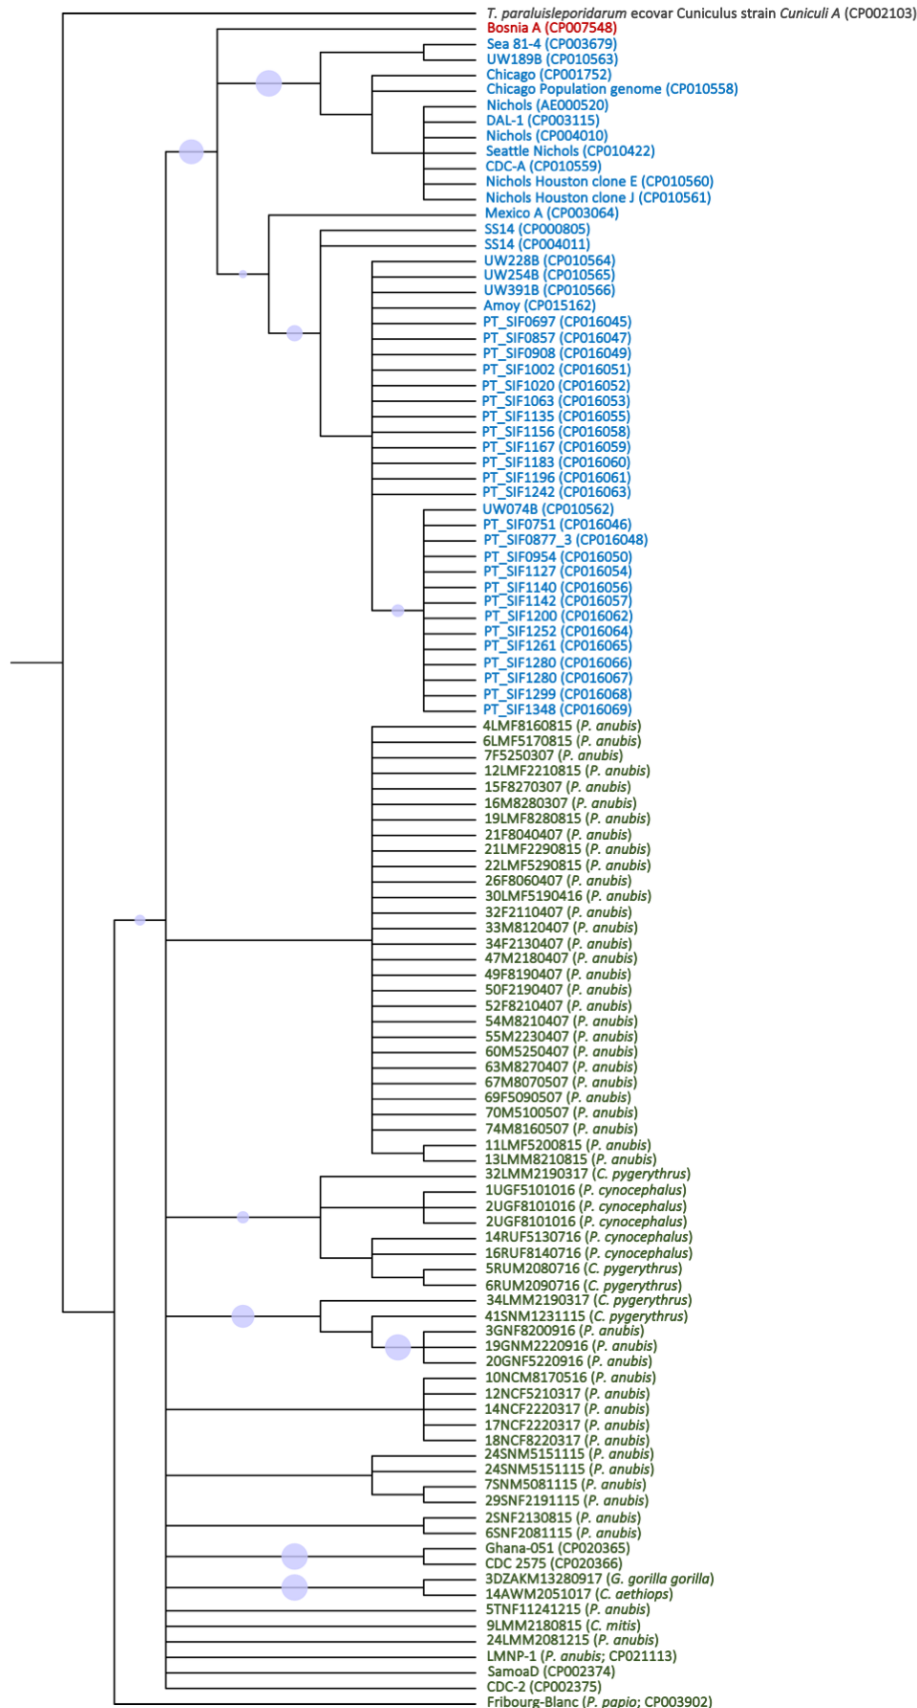

117

118 **Figure S6. Rooted MP tree based on the concatenated sequences used for MLST**  
 119 **(TP0548 and TP0488).** The tree is based on 1,773 nts and 1,000 bootstrap replicates.



120 Bootstrap values from 80-100% are highlighted as light blue circles of respective size. NHP  
121 species and/or GenBank accession numbers of published strains are provided in parentheses  
122 following the name of the strain. In all cases where the species is not mentioned, sequences are  
123 from *TP* of human origin. Blue=subsp. *pallidum*, green=subsp. *pertenue*, red=subsp.  
124 *endemicum*. The pathogen causing rabbit syphilis, *Treponema paraluisleporidarum* ecovar  
125 *Cuniculus* strain Cuniculi A, is used as an outgroup. The bar refers to substitutions per site.  
126 Gaps were coded as fifth character.

127

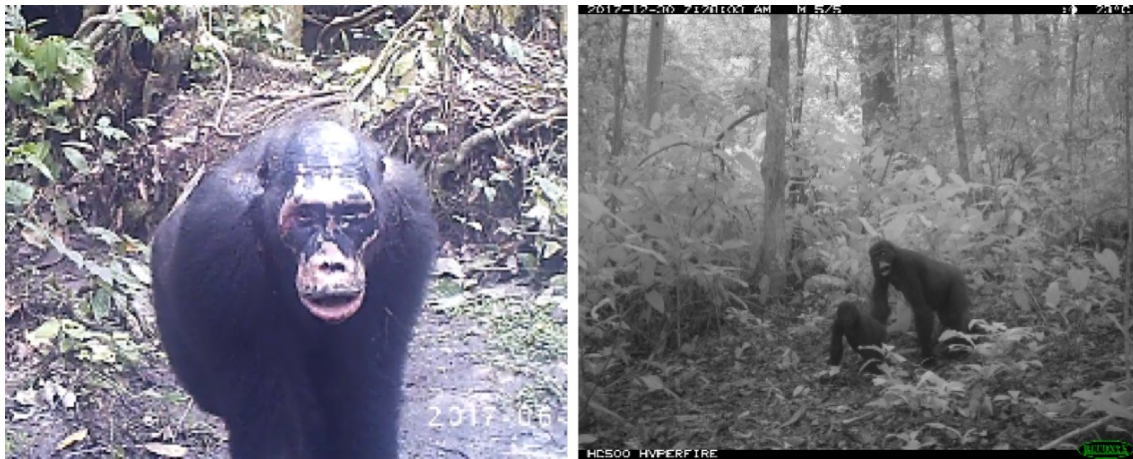

128  
129 **Figure S7. Camera trap photos of Western lowland gorillas with severe ulcerative skin**

130 **lesions at Odzala-Kokoua National Park, Republic of the Congo, in 2017.** Fecal samples  
131 analyzed in this study were collected in the same area and originated from animals with  
132 severe facial lesions. The images are not covered by the CC BY license. Image credits to  
133 African Parks ([www.african-parks.org](http://www.african-parks.org)). All rights reserved, used with permission. When  
134 using the images online and across all platforms, African Parks and the photographer must be  
135 named appropriately, and African Parks and Odzala--Kokoua National Park should be  
136 mentioned using the following social media handles: on Twitter: @AfricanParks, Instagram:  
137 @AfricanParksNetwork and Facebook: @AfricanParks.Odzala--Kokoua National Park.

138

139 **Supplementary References**

- 140 37. Grillová, L., Noda, A. A., Lienhard, R., Blanco, O., Rodríguez, I. & Šmajš, D.  
141 Multilocus sequence typing of *Treponema pallidum* subsp. *pallidum* in Cuba from 2012  
142 to 2017. *J Infect Dis*, jiy604 (2018).
- 143 38. Arora, N., Schuenemann, V., Jager, G., Peltzer, A., Seitz, A., Herbig, A., et al. Origin of  
144 modern syphilis and emergence of a pandemic *Treponema pallidum* cluster. *Nat*  
145 *Microbiol* **2**, 16245 (2016).
- 146 39. Flasarová, M., Pospíšilová, P., Mikalová, L., Vališová, Z., Dastychová, E., Strnadel, R.,  
147 et al. Sequencing-based molecular typing of *Treponema pallidum* strains in the Czech  
148 Republic: all identified genotypes are related to the sequence of the SS14 strain. *Acta*  
149 *Derm Venereol* **92**, 669-674 (2012).
- 150 40. Čejkova, D., Zobaníková, M., Chen, L., Pospíšilová, P., Strouhal, M., Qin, X., et al.  
151 Whole genome sequences of three *Treponema pallidum* ssp. *pertenue* strains: yaws and  
152 syphilis treponemes differ in less than 0.2% of the genome sequence. *PLoS Negl Trop*  
153 *Dis* **6**, e1471 (2012).
- 154 41. Zobaníková, M., Strouhal, M., Mikalová, L., Čejkova, D., Ambrožová, L., Pospíšilová,  
155 P., et al. Whole genome sequence of the *Treponema* Fribourg-Blanc: unspecified simian  
156 isolate is highly similar to the yaws subspecies. *PLoS Negl Trop Dis* **7**, e2172 (2013).
- 157 42. Strouhal, M., Mikalová, L., Haviernik, J., Knauf, S., Bruisten, S., Noordhoek, G. T., et  
158 al. Complete genome sequences of two strains of *Treponema pallidum* subsp. *pertenue*  
159 from Indonesia: Modular structure of several treponemal genes. *PLoS Negl Trop Dis* **12**,  
160 e0006867 (2018).
- 161 43. Marks, M., Fookes, M., Wagner, J., Butcher, R., Ghinai, R., Sokana, O., et al.  
162 Diagnostics for yaws eradication: Insights from direct next-generation sequencing of  
163 cutaneous strains of *Treponema pallidum*. *Clin Infect Dis* **66**, 818-824 (2018).
